# Supplementary figures and images for: Production of tetra-methylpyrazine using engineered Corynebacterium glutamicum
Source: PubMed Central journal article supplement — Metab Eng Commun. 2019 Dec 2;10:e00115. doi: 10.1016/j.mec.2019.e00115 (PMC6926172; doi:10.1016/j.mec.2019.e00115), 2019-12-02

SF1A.

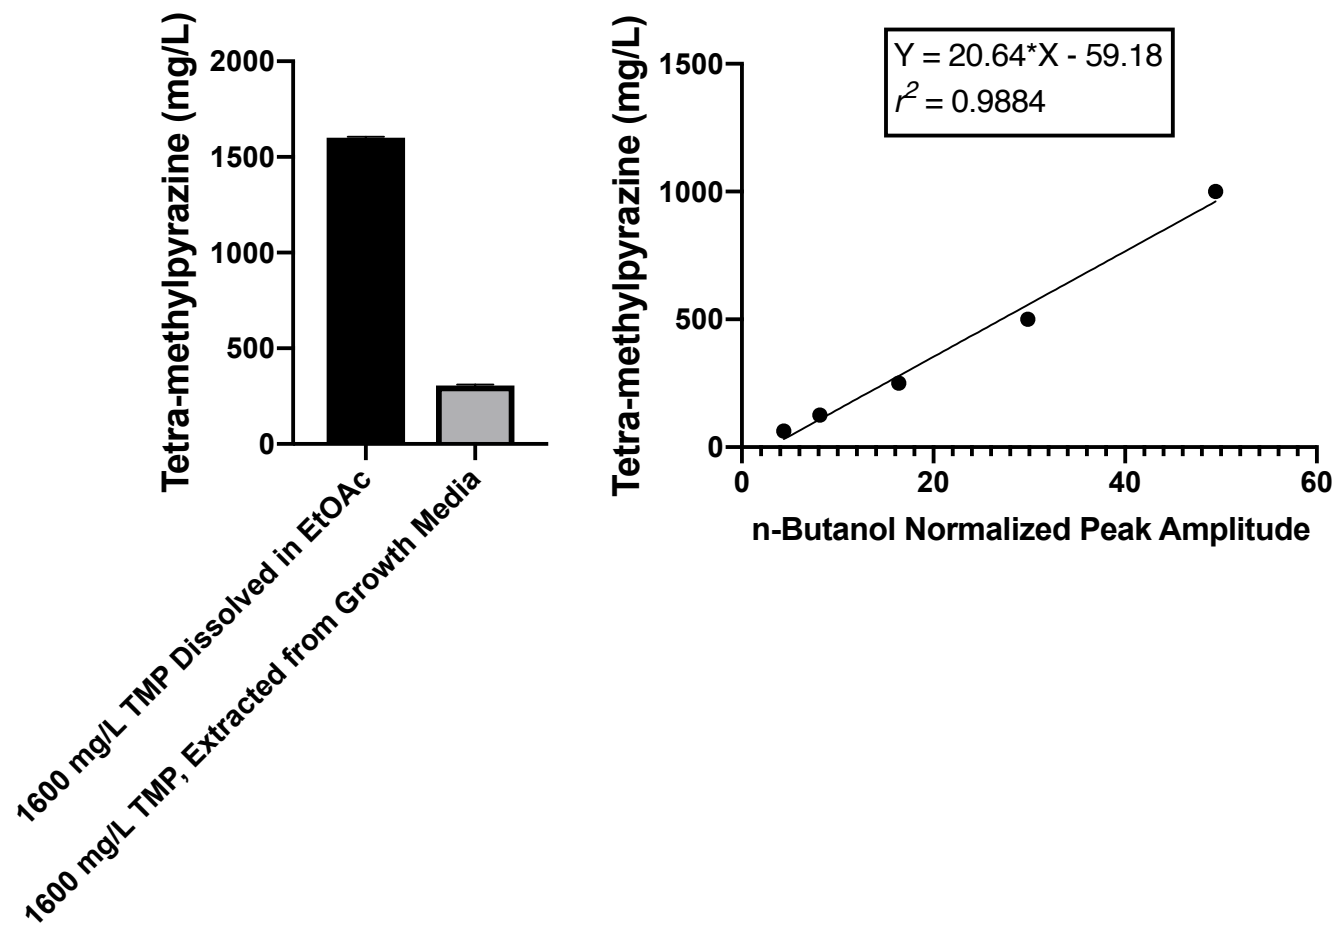

SF1B.

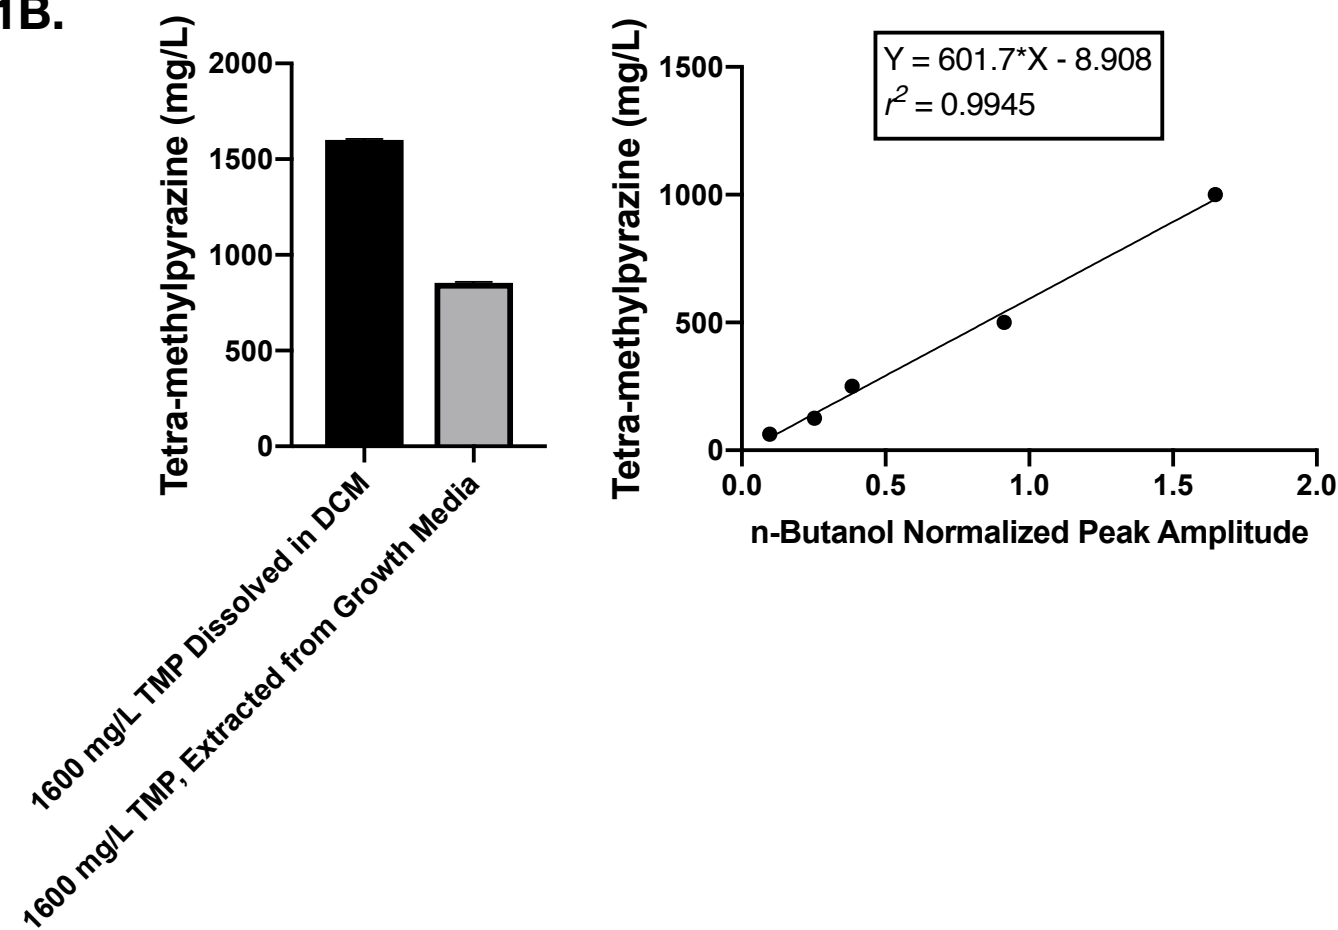

SF1C.

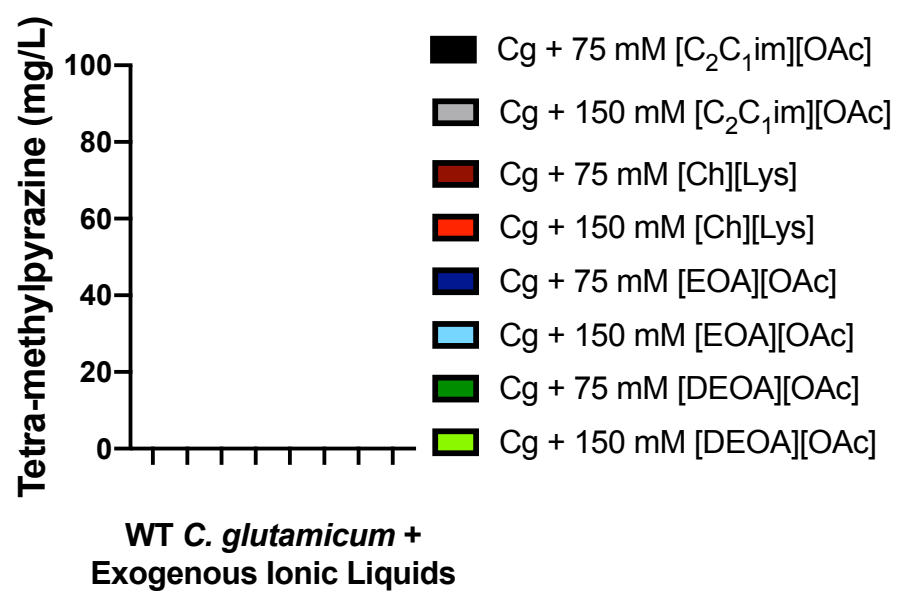

Supplement: mmc3.pdf [file mmc3.pdf]

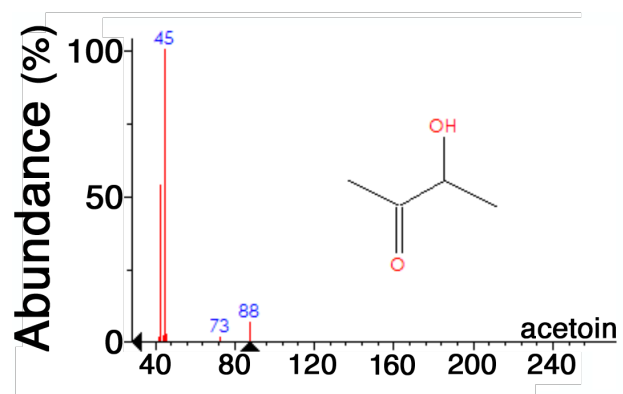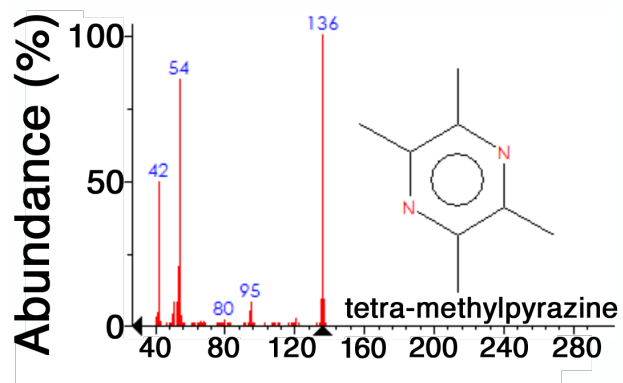

Supplement: mmc4.pdf [file mmc4.pdf]

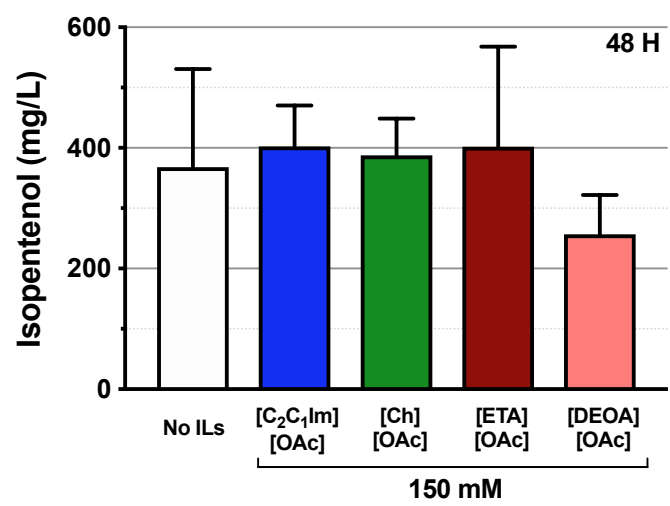

Supplement: mmc5.pdf [file mmc5.pdf]
